# Supplementary material
Source: Springer Nature journal article supplement (https://www.springermedizin.de/resource/supplementary/12911_2010_389_MOESM7_ESM.pdf/9525626)
Supplement: MOESM7 [file 9525626]

## Percent of patients with HbA1c less than 7

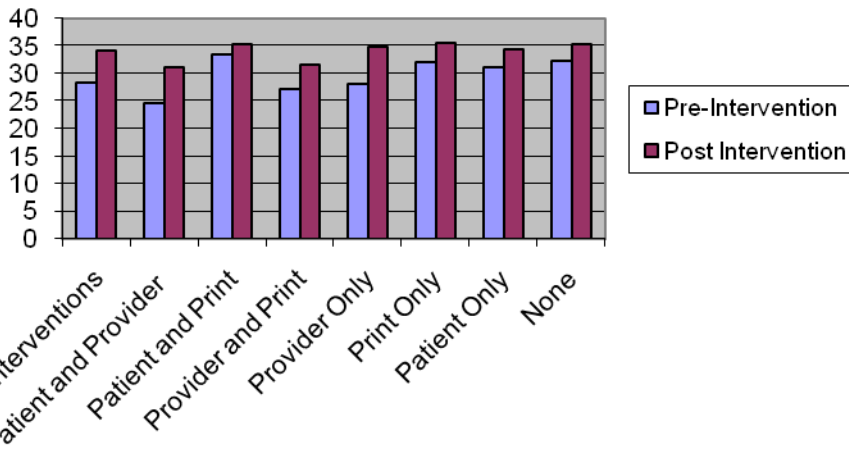

“Patient”: Patients received mailed patient report cards

“Provider”: Patients were identified on the enhanced provider report card

“Print”: Patients attended clinics where patient report cards were distributed at each visit
